# Supplementary material for: Comprehensive Transcriptomic Profiling Identifies Breast Cancer Patients Who May Be Spared Adjuvant Systemic Therapy
Source: Oxford University Press journal article supplement (doi:10.1158/1078-0432.ccr-19-1038), 2019-09-26
Supplement: 10780432ccr191038-sup-219764_3_supp_5720890_pwfbk0.xlsx [file 10780432ccr191038-sup-219764_3_supp_5720890_pwfbk0.xlsx]

## Sheet: Sheet1
eTable 6. Top 10 enriched pathways for each signature.
	All genes represented in Average Genomic Risk		Genes of MET141
Rank	Pathway Name	P-value	Pathway Name	P-value
1	Endosomal/Vacuolar pathway	1.11e-16	Mitotic G1-G1/S phases	7.01e-14
2	Cell Cycle, Mitotic	1.11e-16	Cell Cycle	2.8e-12
3	Cell Cycle	1.11e-16	G1/S Transition	7.78e-12
4	Cell Cycle Checkpoints	2.22e-16	Cell Cycle, Mitotic	8.84e-11
5	Antigen Presentation: Folding, assembly and peptide loading of class I MHC	8.88e-16	DNA Replication Pre-Initiation	1.6e-08
6	Mitotic G1-G1/S phases	9.57e-14	G2/M Checkpoints	7.47e-08
7	G1/S Transition	2.58e-13	G1/S-Specific Transcription	7.85e-08
8	Interferon alpha/beta signaling	3.63e-11	Assembly of the pre-replicative complex	2.08e-07
9	G0 and Early G1	3.61e-10	DNA Replication	2.21e-07
10	ER-Phagosome pathway	8.49e-10	Activation of the pre-replicative complex	3.87e-07
