# Supplementary material for: Comprehensive Transcriptomic Profiling Identifies Breast Cancer Patients Who May Be Spared Adjuvant Systemic Therapy
Source: Oxford University Press journal article supplement (doi:10.1158/1078-0432.ccr-19-1038), 2019-09-26
Supplement: 10780432ccr191038-sup-219764_3_supp_5720891_pw3bk0.xlsx [file 10780432ccr191038-sup-219764_3_supp_5720891_pw3bk0.xlsx]

## Sheet: Sheet1
Risk score name	Genefu function	Genes in genefu signature function	Genes available in GeneChip Human Exon 1.0 ST (SweBCG91-RT)	Genes available in Illumina Human v3 (METABRIC)
OncotypeDx-like	oncotypedx	16 cancer related genes	All 16 cancer related genes are available.	15 of 16 cancer genes are available. Missing Entrez gene ID: 573
Endopredict-like	endoPredict	8 cancer related genes	All 8 cancer related genes are available.	7 of 8 genes are available. Missing Entrez gene ID: 1717
Genomic Grade Index-like	ggi	Of 128 unique probes listed, 11 are not mapped to any Entrez gene identifiers. Of the 117 listed Entrez gene identifiers, 104 are unique.	All 104 unique genes are available.	102 of 104 genes are available. Missing Entrez gene IDs: 701, 79682
PAM505ROR-like	rorS	50 genes	All 50 genes are available.	47 of 50 genes are available. Missing Entrez gene IDs: 573, 26996, 120224
Gene70-like	gene70	Of the 70 probes listed, 14 are not mapped to any Entrez gene identifier. Of the 56 listed Entrez gene identifiers, 52 are unique.	All 52 genes are available.	49 of 52 genes are available.
				Missing Entrez gene IDs: 2947, 55321, 51560
GeniusM3-like	genius	229 unique genes.	All 229 genes are available.	223 of 229 available.
				Missing Entrez gene IDs: 79682, 6839, 6634, 51279, 4719, 8772
TAMR-like	tamr13	Out of 239 unique probes, there are 169 unique gene symbols with Entrez gene identifiers.	All 169 are available.	All 169 are available.
PIK3CAGS-like	pik3cags	Out of 278 unique probes, there are 236 unique Entrez gene identifiers.	234 of 236 are available.	225 of 236 genes are available. Missing Entrez gene IDs: 26503, 4824, 5350, 93349, 4680, 875, 3120, 5021, 8337, 8349, 57235
	In order to make the directionality of the scores in line with the other signatures, with high scores associated with high risk of recurrence, the final risk score used in the study is the negative of the score provided from genefu.		Missing Entrez gene IDs: 8337, 57235
Gene76-like	gene76	Out of 76 probes listed, 4 are not mapped to an Entrez gene identifier. The remaining 72 probes map to 67 unique genes.	All 67 genes are available.	64 of 67 are available. Missing Entrez gene IDs: 3606, 79682, 101928104
