# Supplementary material for: Comprehensive Transcriptomic Profiling Identifies Breast Cancer Patients Who May Be Spared Adjuvant Systemic Therapy
Source: Oxford University Press journal article supplement (doi:10.1158/1078-0432.ccr-19-1038), 2019-09-26
Supplement: 10780432ccr191038-sup-219764_3_supp_5720894_pw4bk0.xlsx [file 10780432ccr191038-sup-219764_3_supp_5720894_pw4bk0.xlsx]

## Sheet: 180712run_breast_grid_genes_pat
	Celera-like	Endopredict-like	ExagenBC-like	Gene70-like	Gene76-like	GeniusM3-like	GGI-like	Mammostrat-like	MGI	OncotypeDx-like	PAM50-like	PIK3CAGS-like	TAMR13-like	Toronto 2017-like	Two Gene Ratio-like
Celera-like	14 / 14 (100%)	0 / 14 (0%)	0 / 14 (0%)	4 / 14 (29%)	0 / 14 (0%)	5 / 14 (36%)	7 / 14 (50%)	0 / 14 (0%)	2 / 14 (14%)	2 / 14 (14%)	4 / 14 (29%)	0 / 14 (0%)	7 / 14 (50%)	9 / 14 (64%)	0 / 14 (0%)
Endopredict-like	0 / 8 (0%)	8 / 8 (100%)	1 / 8 (12%)	0 / 8 (0%)	0 / 8 (0%)	2 / 8 (25%)	2 / 8 (25%)	0 / 8 (0%)	0 / 8 (0%)	1 / 8 (12%)	2 / 8 (25%)	0 / 8 (0%)	2 / 8 (25%)	2 / 8 (25%)	0 / 8 (0%)
ExagenBC-like	0 / 3 (0%)	1 / 3 (33%)	3 / 3 (100%)	0 / 3 (0%)	0 / 3 (0%)	1 / 3 (33%)	1 / 3 (33%)	0 / 3 (0%)	0 / 3 (0%)	1 / 3 (33%)	1 / 3 (33%)	0 / 3 (0%)	1 / 3 (33%)	1 / 3 (33%)	0 / 3 (0%)
Gene70-like	4 / 52 (7.7%)	0 / 52 (0%)	0 / 52 (0%)	52 / 52 (100%)	1 / 52 (1.9%)	4 / 52 (7.7%)	8 / 52 (15%)	0 / 52 (0%)	1 / 52 (1.9%)	1 / 52 (1.9%)	1 / 52 (1.9%)	0 / 52 (0%)	8 / 52 (15%)	23 / 52 (44%)	0 / 52 (0%)
Gene76-like	0 / 67 (0%)	0 / 67 (0%)	0 / 67 (0%)	1 / 67 (1.5%)	67 / 67 (100%)	3 / 67 (4.5%)	6 / 67 (9%)	0 / 67 (0%)	0 / 67 (0%)	0 / 67 (0%)	0 / 67 (0%)	6 / 67 (9%)	6 / 67 (9%)	3 / 67 (4.5%)	0 / 67 (0%)
GeniusM3-like	5 / 229 (2.2%)	2 / 229 (0.87%)	1 / 229 (0.44%)	4 / 229 (1.7%)	3 / 229 (1.3%)	229 / 229 (100%)	34 / 229 (15%)	0 / 229 (0%)	3 / 229 (1.3%)	3 / 229 (1.3%)	9 / 229 (3.9%)	8 / 229 (3.5%)	34 / 229 (15%)	21 / 229 (9.2%)	0 / 229 (0%)
GGI-like	7 / 104 (6.7%)	2 / 104 (1.9%)	1 / 104 (0.96%)	8 / 104 (7.7%)	6 / 104 (5.8%)	34 / 104 (33%)	104 / 104 (100%)	1 / 104 (0.96%)	4 / 104 (3.8%)	5 / 104 (4.8%)	13 / 104 (12%)	0 / 104 (0%)	41 / 104 (39%)	32 / 104 (31%)	0 / 104 (0%)
Mammostrat-like	0 / 5 (0%)	0 / 5 (0%)	0 / 5 (0%)	0 / 5 (0%)	0 / 5 (0%)	0 / 5 (0%)	1 / 5 (20%)	5 / 5 (100%)	0 / 5 (0%)	0 / 5 (0%)	0 / 5 (0%)	1 / 5 (20%)	0 / 5 (0%)	3 / 5 (60%)	0 / 5 (0%)
MGI	2 / 5 (40%)	0 / 5 (0%)	0 / 5 (0%)	1 / 5 (20%)	0 / 5 (0%)	3 / 5 (60%)	4 / 5 (80%)	0 / 5 (0%)	5 / 5 (100%)	0 / 5 (0%)	1 / 5 (20%)	0 / 5 (0%)	5 / 5 (100%)	5 / 5 (100%)	0 / 5 (0%)
OncotypeDx-like	2 / 16 (12%)	1 / 16 (6.2%)	1 / 16 (6.2%)	1 / 16 (6.2%)	0 / 16 (0%)	3 / 16 (19%)	5 / 16 (31%)	0 / 16 (0%)	0 / 16 (0%)	16 / 16 (100%)	11 / 16 (69%)	3 / 16 (19%)	4 / 16 (25%)	10 / 16 (62%)	0 / 16 (0%)
PAM50-like	4 / 50 (8%)	2 / 50 (4%)	1 / 50 (2%)	1 / 50 (2%)	0 / 50 (0%)	9 / 50 (18%)	13 / 50 (26%)	0 / 50 (0%)	1 / 50 (2%)	11 / 50 (22%)	50 / 50 (100%)	5 / 50 (10%)	15 / 50 (30%)	36 / 50 (72%)	0 / 50 (0%)
PIK3CAGS-like	0 / 236 (0%)	0 / 236 (0%)	0 / 236 (0%)	0 / 236 (0%)	6 / 236 (2.5%)	8 / 236 (3.4%)	0 / 236 (0%)	1 / 236 (0.42%)	0 / 236 (0%)	3 / 236 (1.3%)	5 / 236 (2.1%)	236 / 236 (100%)	3 / 236 (1.3%)	2 / 236 (0.85%)	0 / 236 (0%)
TAMR13-like	7 / 169 (4.1%)	2 / 169 (1.2%)	1 / 169 (0.59%)	8 / 169 (4.7%)	6 / 169 (3.6%)	34 / 169 (20%)	41 / 169 (24%)	0 / 169 (0%)	5 / 169 (3%)	4 / 169 (2.4%)	15 / 169 (8.9%)	3 / 169 (1.8%)	169 / 169 (100%)	31 / 169 (18%)	0 / 169 (0%)
Toronto 2017-like	9 / 95 (9.5%)	2 / 95 (2.1%)	1 / 95 (1.1%)	23 / 95 (24%)	3 / 95 (3.2%)	21 / 95 (22%)	32 / 95 (34%)	3 / 95 (3.2%)	5 / 95 (5.3%)	10 / 95 (11%)	36 / 95 (38%)	2 / 95 (2.1%)	31 / 95 (33%)	95 / 95 (100%)	0 / 95 (0%)
Two Gene Ratio-like	0 / 2 (0%)	0 / 2 (0%)	0 / 2 (0%)	0 / 2 (0%)	0 / 2 (0%)	0 / 2 (0%)	0 / 2 (0%)	0 / 2 (0%)	0 / 2 (0%)	0 / 2 (0%)	0 / 2 (0%)	0 / 2 (0%)	0 / 2 (0%)	0 / 2 (0%)	2 / 2 (100%)
