# Supplementary material for: Comprehensive Transcriptomic Profiling Identifies Breast Cancer Patients Who May Be Spared Adjuvant Systemic Therapy
Source: Oxford University Press journal article supplement (doi:10.1158/1078-0432.ccr-19-1038), 2019-09-26
Supplement: 10780432ccr191038-sup-219764_3_supp_5720895_pw5bk0.xlsx [file 10780432ccr191038-sup-219764_3_supp_5720895_pw5bk0.xlsx]

## Sheet: Sheet1
Celera	Fold Enrichment	Raw P-value	FDR
regulation of cell cycle (GO:0051726)	22.63	0.000299	0.0365
DNA metabolic process (GO:0006259)	14.35	0.000141	0.0345
GENIUSM3	Fold Enrichment	Raw P-value	FDR
DNA recombination (GO:0006310)	7.23	0.00287	0.0466
DNA replication (GO:0006260)	7.18	2.47e-07	3.01e-05
cell growth (GO:0016049)	5.75	0.000821	0.0154
DNA metabolic process (GO:0006259)	4.8	1.57e-08	3.83e-06
DNA repair (GO:0006281)	4.5	0.000551	0.0134
cell cycle (GO:0007049)	2.86	1.4e-05	0.000852
nucleobase-containing compound metabolic process (GO:0006139)	1.85	6.7e-06	0.000545
phosphate-containing compound metabolic process (GO:0006796)	1.83	0.00136	0.0236
nitrogen compound metabolic process (GO:0006807)	1.82	3.13e-05	0.00153
cellular component organization (GO:0016043)	1.77	0.000737	0.015
cellular component organization or biogenesis (GO:0071840)	1.75	0.000699	0.0155
primary metabolic process (GO:0044238)	1.46	0.000388	0.0105
metabolic process (GO:0008152)	1.42	0.00017	0.0052
cellular process (GO:0009987)	1.36	3.32e-05	0.00135
Unclassified (UNCLASSIFIED)	0.73	8.92e-05	0.00311
GGI	Fold Enrichment	Raw P-value	FDR
chromosome segregation (GO:0007059)	27.94	5.56e-15	4.52e-13
meiosis (GO:0007126)	19.96	9.33e-07	1.63e-05
mitosis (GO:0007067)	16.07	1.92e-16	2.35e-14
DNA replication (GO:0006260)	15.77	3.33e-11	1.62e-09
cell proliferation (GO:0008283)	15.4	2.56e-05	0.000391
regulation of cell cycle (GO:0051726)	13.31	2.11e-10	8.56e-09
DNA metabolic process (GO:0006259)	10.02	8.84e-14	5.39e-12
cell cycle (GO:0007049)	9.7	4.33e-24	1.06e-21
cytokinesis (GO:0000910)	8.97	7.07e-05	0.000959
DNA repair (GO:0006281)	7.41	0.000194	0.00225
reproduction (GO:0000003)	5.09	0.00132	0.0146
cellular component movement (GO:0006928)	4.73	2.52e-05	0.000409
chromatin organization (GO:0006325)	4.53	0.00234	0.0248
organelle organization (GO:0006996)	3.91	1.69e-08	4.59e-07
phosphate-containing compound metabolic process (GO:0006796)	3.62	1.74e-09	6.07e-08
cytoskeleton organization (GO:0007010)	3.57	0.00378	0.0384
cellular component organization (GO:0016043)	2.84	5.35e-07	1.09e-05
cellular component organization or biogenesis (GO:0071840)	2.75	5.65e-07	1.06e-05
nucleobase-containing compound metabolic process (GO:0006139)	2.58	5.88e-08	1.43e-06
nitrogen compound metabolic process (GO:0006807)	2.21	8.39e-05	0.00102
metabolic process (GO:0008152)	1.9	1.76e-07	3.89e-06
primary metabolic process (GO:0044238)	1.78	7.16e-05	0.000919
cellular process (GO:0009987)	1.73	9.27e-09	2.83e-07
Unclassified (UNCLASSIFIED)	0.59	5.76e-05	0.000827
cell surface receptor signaling pathway (GO:0007166)	< 0.01	0.0044	0.0429
PAM50	Fold Enrichment	Raw P-value	FDR
meiosis (GO:0007126)	18.85	0.000619	0.0378
negative regulation of apoptotic process (GO:0043066)	15.74	0.00014	0.0114
mitosis (GO:0007067)	11.81	2.4e-06	0.000293
cell cycle (GO:0007049)	6.47	2.62e-07	6.39e-05
TAMR13	Fold Enrichment	Raw P-value	FDR
chromosome segregation (GO:0007059)	15.47	6.8e-11	4.15e-09
meiosis (GO:0007126)	13.97	1.33e-06	3.25e-05
cell proliferation (GO:0008283)	12.93	2.15e-06	4.37e-05
mitosis (GO:0007067)	10.18	1.63e-13	1.98e-11
regulation of cell cycle (GO:0051726)	9.98	8.44e-11	4.12e-09
DNA recombination (GO:0006310)	9.52	0.00106	0.0112
regulation of gene expression, epigenetic (GO:0040029)	6.97	0.00311	0.0304
DNA metabolic process (GO:0006259)	6.65	1.8e-11	1.46e-09
DNA replication (GO:0006260)	6.31	5.7e-05	0.000772
cytokinesis (GO:0000910)	6.28	0.000171	0.00209
DNA repair (GO:0006281)	5.93	8.61e-05	0.00111
cell cycle (GO:0007049)	5.65	1.36e-15	3.31e-13
reproduction (GO:0000003)	4.58	0.000205	0.00238
cytoskeleton organization (GO:0007010)	3.37	0.00054	0.00599
cellular component movement (GO:0006928)	2.84	0.00208	0.0212
organelle organization (GO:0006996)	2.76	2.01e-06	4.47e-05
phosphate-containing compound metabolic process (GO:0006796)	2.72	6.55e-08	1.78e-06
nitrogen compound metabolic process (GO:0006807)	2.45	1.51e-09	6.13e-08
biosynthetic process (GO:0009058)	2.34	4.61e-06	8.66e-05
cellular component organization (GO:0016043)	2.14	2.73e-05	0.000444
cellular component organization or biogenesis (GO:0071840)	2.06	4.92e-05	0.000706
nucleobase-containing compound metabolic process (GO:0006139)	1.99	6.74e-06	0.000117
metabolic process (GO:0008152)	1.73	2.49e-08	7.61e-07
cellular process (GO:0009987)	1.56	1.29e-08	4.5e-07
Unclassified (UNCLASSIFIED)	0.67	2.76e-05	0.00042
Toronto 2017	Fold Enrichment	Raw P-value	FDR
meiosis (GO:0007126)	20.16	8.81e-07	3.58e-05
cell proliferation (GO:0008283)	18.66	1.34e-06	4.68e-05
chromosome segregation (GO:0007059)	15.19	6.26e-07	3.06e-05
mitosis (GO:0007067)	13.53	7.73e-13	9.43e-11
regulation of cell cycle (GO:0051726)	11.2	3.44e-08	2.8e-06
amino acid transport (GO:0006865)	10.04	0.000806	0.0116
DNA replication (GO:0006260)	9.29	1.39e-05	0.000376
cytokinesis (GO:0000910)	9.06	6.7e-05	0.00136
negative regulation of apoptotic process (GO:0043066)	8.42	0.00151	0.0194
cell cycle (GO:0007049)	7.2	8.96e-15	2.19e-12
reproduction (GO:0000003)	5.14	0.00125	0.017
DNA metabolic process (GO:0006259)	4.8	0.000128	0.00223
cytoskeleton organization (GO:0007010)	4.64	0.000162	0.00248
regulation of phosphate metabolic process (GO:0019220)	4.27	6.21e-05	0.00138
organelle organization (GO:0006996)	3.27	5.08e-06	0.000155
phosphate-containing compound metabolic process (GO:0006796)	2.61	6.77e-05	0.00127
cellular component organization (GO:0016043)	2.44	4.97e-05	0.00121
cellular component organization or biogenesis (GO:0071840)	2.28	0.000158	0.00257
biological regulation (GO:0065007)	1.81	0.00233	0.0284
cellular process (GO:0009987)	1.64	5.52e-07	3.37e-05
Unclassified (UNCLASSIFIED)	0.69	0.00359	0.0418
